# Supplementary material for: Hollow nanoshell of layered double hydroxide
Source: Royal Society of Chemistry journal article supplement (doi:10.1039/b605889b), 2006-01-01
Supplement: b605889b.pdf [file b605889b.pdf]

## Hollow Nanoshell of Layered Double Hydroxide

Liang Li, Renzhi Ma, Nobuo Iyi, Yasuo Ebina, Kazunori Takada  
and Takayoshi Sasaki\*

*Nanoscale Materials Center, National Institute for Materials Science, 1-1 Namiki, Tsukuba, Ibaraki 305-0044, Japan.*

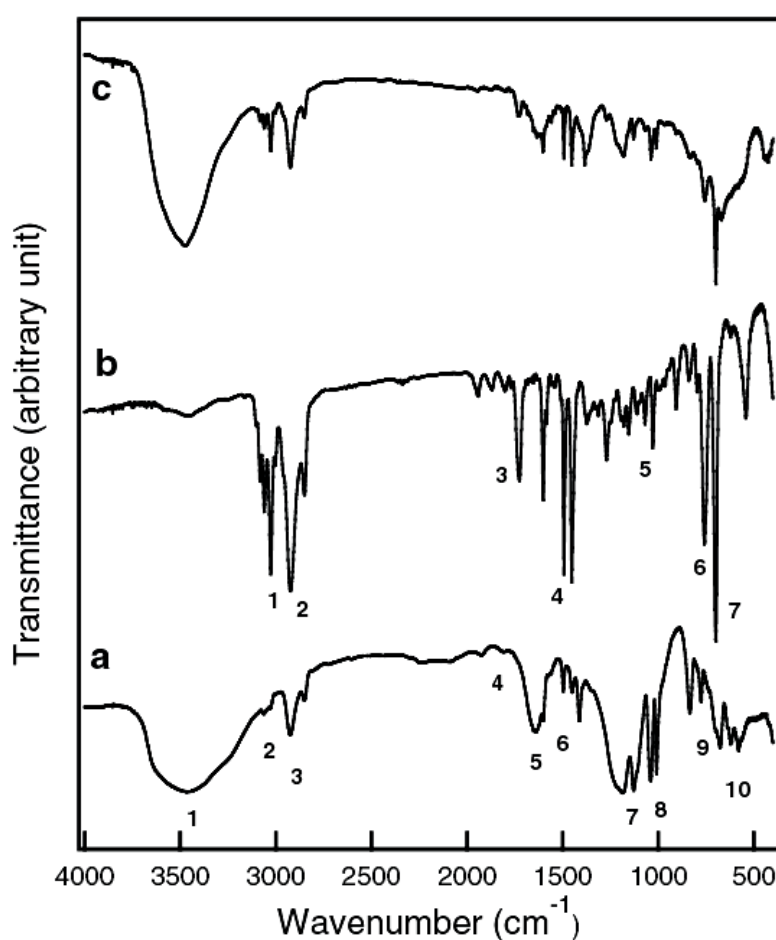

**Figure S1** FT-IR spectra of PSS (a), PS (b) and the LDH core-shell composite (c).

For PSS (line a): **1.** 3700 - 3000  $\text{cm}^{-1}$ : stretching vibration of  $\text{H}_2\text{O}$ ; **2.** 3100  $\text{cm}^{-1}$  (three peaks): aromatic  $=\text{C}-\text{H}$  stretching vibrations; **3.** 2920  $\text{cm}^{-1}$  (two peaks): alkyl  $\text{C}-\text{H}$  stretching vibrations; **4.** 1810 and 1925  $\text{cm}^{-1}$ : aromatic  $\text{C}-\text{H}$  out of plane bending vibrations; **5.** 1640  $\text{cm}^{-1}$ :  $\text{O}-\text{H}$  bending vibrations of  $\text{H}_2\text{O}$ ; **6.** 1600, 1500, 1450 and 1410  $\text{cm}^{-1}$ : aromatic  $-\text{C}=\text{C}-$  stretching vibrations; **7.**

1190 and 1130  $\text{cm}^{-1}$ :  $\text{-SO}_3^-$  asymmetric stretching vibrations; **8.** 1040 and 1005  $\text{cm}^{-1}$ :  $\text{-SO}_3^-$  symmetric stretching vibrations; **9.** 836, 771 and 682  $\text{cm}^{-1}$ :  $\text{=C-H}$  out of plane deformation vibrations; **10.** 620  $\text{cm}^{-1}$ : ring in-plane deformation vibrations.

For PS (line b): **1.** 3100  $\text{cm}^{-1}$  (three peaks): aromatic  $\text{=C-H}$  stretching vibrations; **2.** 2920  $\text{cm}^{-1}$  (two peaks): alkyl  $\text{C-H}$  stretching vibrations; **3.** 1730 - 1950  $\text{cm}^{-1}$  (four peaks): aromatic  $\text{C-H}$  out of plane bending vibrations; **4.** 1600, 1500, 1450 and 1410  $\text{cm}^{-1}$ : aromatic  $\text{-C=C-}$  stretching vibrations; **5.** 1272, 1182, 1155, 1112, 1070, 1022 and 996  $\text{cm}^{-1}$ : aromatic  $\text{=C-H}$  in-plane deformation vibrations; **6.** 840 and 760  $\text{cm}^{-1}$ : aromatic  $\text{=C-H}$  out-of-plane deformation vibrations; **7.** 701 and 541  $\text{cm}^{-1}$ : out-of- plane ring deformation vibration.
